# Supplementary material
Source: PubMed Central journal article supplement (PMC5197062)
Supplement: thnov07p0253s1.pdf [file thnov07p0253s1.pdf]

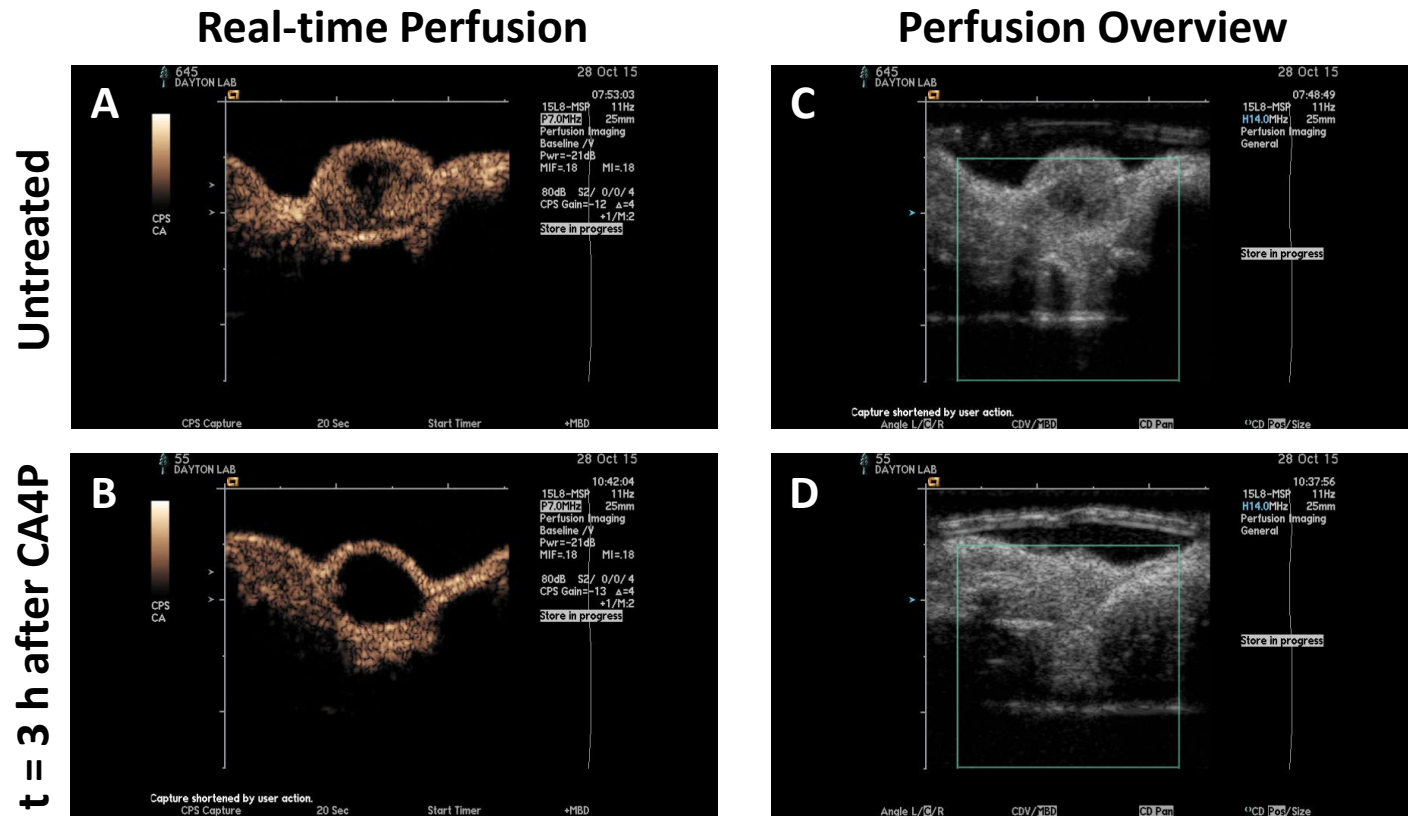

**Figure S1: CA4P vessel occlusion, continued. Videos are of tumors from mice receiving microbubbles as an ultrasound contrast agent t = 3 h after CA4P treatment or untreated control. Real-time microbubble perfusion into the middle tumor section of untreated (A) or CA4P-treated (B) mice. Microbubble perfusion at t = 20 s in each imaged section along the tumor in untreated (C) or CA4P-treated (D) mice.**

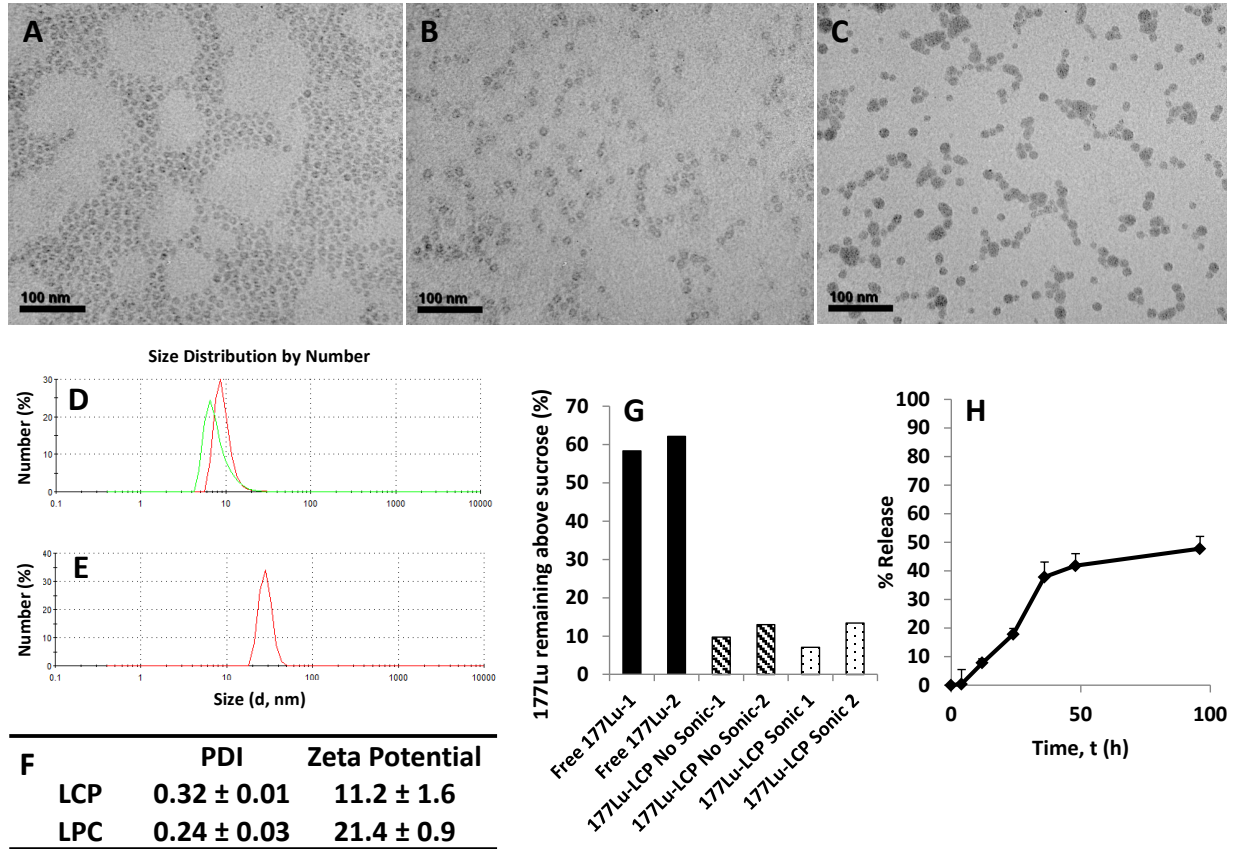

Figure S2: Nanoparticles were characterized using TEM and DLS. A) TEM image of <sup>177</sup>Lu-LCP cores; B) TEM image of <sup>90</sup>Y-LCP cores. C) TEM image of LPC cores. D) DLS number distribution of final LCP size; Red = <sup>177</sup>Lu-LCP, Green = <sup>90</sup>Y-LCP. E) DLS number distribution of final LPC nanoparticle size. F) PDI and Zeta Potential for LCP and LPC, n = 3. G) Quantification of <sup>177</sup>Lu remaining in top aqueous layer after sucrose gradient centrifugation; most free <sup>177</sup>Lu remained at the top while most LCP-encapsulated <sup>177</sup>Lu was centrifuged lower. There was no difference in this <sup>177</sup>Lu distribution between sonicated and non-sonicated LCP (p > 0.78). n = 2. H) Release profile of <sup>177</sup>Lu-LCP in tris-buffered saline at pH 7.4 and 37°C. n = 2.

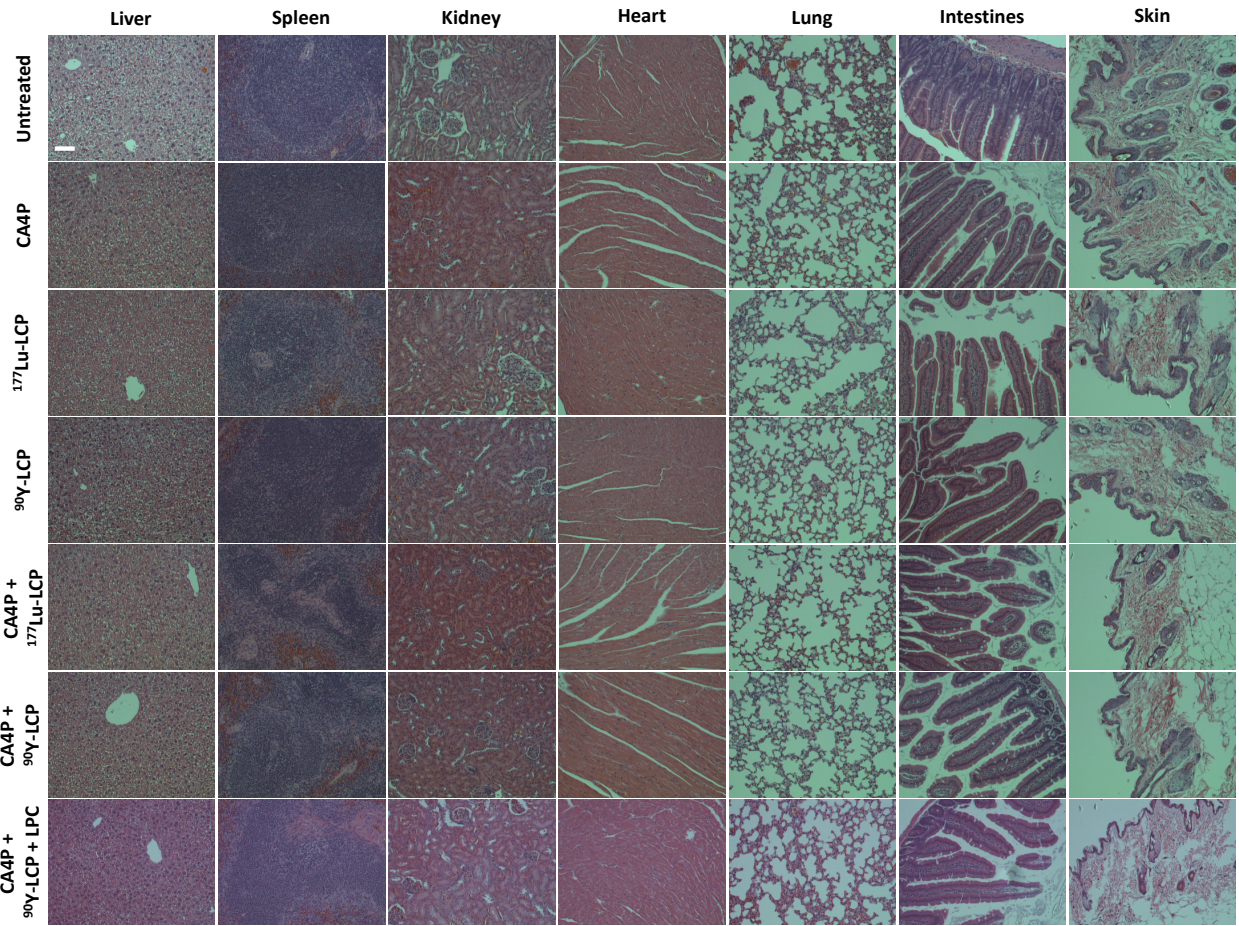

**Fig S3: Healthy CD-1 mouse organs fixed, sectioned, and stained with hematoxylin and eosin 10 days after treatment to test cumulative toxicity. Scale bar = 150  $\mu$ m.**
